# Supplementary material for: Inhaled nitric oxide and the risk of renal dysfunction in patients with acute respiratory distress syndrome: a propensity-matched cohort study
Source: PubMed Central journal article supplement (PMC5131425; doi:10.1186/s13054-016-1566-0), 2016-11-30

Additional electronic files

**Inhaled nitric oxide and the risk of renal dysfunction in patients with acute respiratory distress syndrome: a propensity-matched cohort study**

| <b>Contents</b>                                                                                               | <b>Page</b> |
|---------------------------------------------------------------------------------------------------------------|-------------|
| <b>Table S1.</b> Baseline variables used for propensity matching .....                                        | 2           |
| <b>Fig. S1.</b> Propensity score distribution for the users and non-users of inhaled nitric oxide (iNO) ..... | 6           |
| <b>Fig. S2.</b> The strength of an unmeasured confounder needed to move the observed effect to the null ..... | 7           |

**Table S1. Baseline Variables Used for Propensity Matching**

| Characteristic                 | Overall cohort (N= 547) |                      |         | Propensity-matched cohort (N= 312) |                      |         |
|--------------------------------|-------------------------|----------------------|---------|------------------------------------|----------------------|---------|
|                                | iNO users<br>(N=216)    | Non-users<br>(N=331) | p-value | iNO users<br>(N=151)               | Non-users<br>(N=151) | p-value |
| Age (yr)                       | 61 ± 17                 | 64 ± 16              | 0.07    | 63 ± 17                            | 62 ± 16              | 0.59    |
| Female, n (%)                  | 66 (30.6)               | 114 (34.4)           | 0.34    | 48 (31.8)                          | 50 (33.1)            | 0.81    |
| Medical ICU, n (%)             | 187 (86.6)              | 248 (74.9)           | 0.001   | 128 (84.8)                         | 132 (87.4)           | 0.51    |
| Height (cm)                    | 162.8 ± 8.7             | 161.8 ± 8.1          | 0.16    | 162.5 ± 8.3                        | 162.6 ± 8.4          | 0.94    |
| Weight (kg)                    | 62 (51-70.5)            | 57 (49-64)           | <0.001  | 60 (50-69)                         | 60 (50-68)           | 0.86    |
| Community-acquired ARDS, n (%) | 163 (75.4)              | 251 (75.8)           | 0.92    | 111 (73.5)                         | 116 (76.8)           | 0.44    |
| Cause of ARDS                  |                         |                      |         |                                    |                      |         |
| Pneumonia                      | 167 (77.3)              | 258 (78.0)           | 0.52    | 121 (80.1)                         | 122 (80.8)           | 0.93    |
| Non-pulmonary sepsis           | 32 (14.8)               | 47 (14.2)            |         | 20 (13.3)                          | 19 (12.6)            |         |
| Acute interstitial pneumonia   | 11 (5.1)                | 10 (3.0)             |         | 7 (4.6)                            | 5 (3.3)              |         |
| Multiple transfusion           | 1 (0.5)                 | 5 (1.5)              |         | 1 (0.7)                            | 2 (1.3)              |         |
| Others                         | 5 (2.3)                 | 11 (3.3)             |         | 2 (1.3)                            | 3 (2.0)              |         |
| Study year                     |                         |                      |         |                                    |                      |         |
| Year 1, n (%)                  | 37 (17.1)               | 27 (8.2)             | 0.001   | 19 (12.6)                          | 21 (13.9)            | 0.97    |
| Year 2, n (%)                  | 37 (17.1)               | 55 (16.6)            |         | 28 (18.5)                          | 27 (17.9)            |         |
| Year 3, n (%)                  | 47 (21.8)               | 59 (17.8)            |         | 35 (23.2)                          | 33 (21.9)            |         |
| Year 4, n (%)                  | 38 (17.6)               | 49 (14.8)            |         | 23 (15.2)                          | 25 (16.6)            |         |

|                                             |                  |                  |      |                  |                  |      |
|---------------------------------------------|------------------|------------------|------|------------------|------------------|------|
| Year 5, n (%)                               | 35 (16.2)        | 83 (25.1)        |      | 28 (18.5)        | 31 (20.5)        |      |
| Year 6, n (%)                               | 15 (6.9)         | 26 (7.9)         |      | 11 (7.3)         | 10 (6.6)         |      |
| Year 7, n (%)                               | 7 (3.2)          | 32 (9.7)         |      | 7 (4.6)          | 4 (2.7)          |      |
|                                             |                  |                  |      |                  |                  |      |
| Renal function profiles                     |                  |                  |      |                  |                  |      |
| Baseline Creatinine clearance (mL/min)      | 63.4 (40.6-89.5) | 54 (34.8-76.9)   | 0.01 | 56.8 (39.2-85.0) | 60.5 (37.9-86.9) | 0.66 |
| Creatinine clearance on ARDS day 1 (mL/min) | 57.0 (35.5-82.2) | 48.3 (31.0-70.2) | 0.01 | 55.2 (35-81)     | 53.8 (33.3-81.5) | 0.97 |
| Urine output (mL/kg)                        | 1.00 ± 0.77      | 1.03 ± 0.83      | 0.66 | 1.01 ± 0.71      | 1.04 ± 0.83      | 0.76 |
| Acute kidney injury, n (%)                  | 73 (33.8)        | 115 (34.7)       | 0.82 | 48 (31.8)        | 50 (33.1)        | 0.81 |
| Stage 1, n (%)                              | 57 (78)          | 91 (79)          | 0.98 | 39 (81)          | 42 (84)          | 0.91 |
| Stage 2, n (%)                              | 9 (12)           | 13 (11)          |      | 5 (10)           | 4 (8)            |      |
| Stage 3, n (%)                              | 7 (10)           | 11 (10)          |      | 4 (8)            | 4 (8)            |      |
|                                             |                  |                  |      |                  |                  |      |
| Body temperature (°C)                       |                  |                  |      |                  |                  |      |
| <35.5                                       | 4 (1.9)          | 11 (3.3)         | 0.19 | 4 (2.7)          | 3 (2.0)          | 0.99 |
| 35.5 ≤ to <36                               | 8 (3.7)          | 18 (5.4)         |      | 4 (2.7)          | 3 (2.0)          |      |
| 36 ≤ to <38                                 | 120 (55.6)       | 152 (45.9)       |      | 79 (52.3)        | 79 (52.3)        |      |
| 38 ≤ to <39                                 | 61 (28.2)        | 102 (30.8)       |      | 46 (30.5)        | 47 (31.1)        |      |
| 39 ≤                                        | 23 (10.7)        | 48 (14.5)        |      | 18 (11.9)        | 19 (12.6)        |      |
| Heart rate (f/min)                          |                  |                  |      |                  |                  |      |

|                                           |             |              |        |              |             |      |
|-------------------------------------------|-------------|--------------|--------|--------------|-------------|------|
| <70                                       | 4 (1.9)     | 10 (3.1)     | 0.93   | 4 (2.7)      | 4 (2.7)     | 0.99 |
| 70≤ to <80                                | 9 (4.2)     | 12 (3.7)     |        | 6 (4.0)      | 5 (3.3)     |      |
| 80≤ to <100                               | 48 (22.5)   | 74 (22.8)    |        | 31 (20.5)    | 35 (23.2)   |      |
| 100≤ to <120                              | 65 (30.5)   | 104 (32.0)   |        | 49 (32.5)    | 48 (31.8)   |      |
| 120≤ to <140                              | 56 (26.3)   | 76 (23.4)    |        | 41 (27.2)    | 38 (25.2)   |      |
| 140≤                                      | 31 (14.6)   | 49 (15.1)    |        | 20 (13.3)    | 21 (13.9)   |      |
| White blood cell count (/μL)              |             |              |        |              |             |      |
| <2000                                     | 20 (9.7)    | 21 (6.6)     | 0.53   | 12 (8.0)     | 14 (9.3)    | 0.94 |
| 2000≤ to <4000                            | 11 (5.3)    | 20 (6.3)     |        | 10(6.6)      | 8 (5.3)     |      |
| 4000≤ to <9000                            | 69 (33.5)   | 96 (30.0)    |        | 50 (33.1)    | 49 (32.5)   |      |
| 9000≤ to <20000                           | 85 (41.3)   | 150 (46.9)   |        | 61 (40.4)    | 65 (43.1)   |      |
| 20000≤                                    | 21 (10.2)   | 33 (10.3)    |        | 18 (11.9)    | 15 (9.9)    |      |
| Opacities on chest radiograph             |             |              |        |              |             |      |
| 2 quadrants, n (%)                        | 52 (24.1)   | 65 (19.6)    | 0.46   | 30 (19.9)    | 34 (22.5)   | 0.79 |
| 3 quadrants, n (%)                        | 58 (26.9)   | 92 (27.8)    |        | 40 (26.5)    | 36 (23.8)   |      |
| 4 quadrants, n (%)                        | 106 (49.1)  | 174 (52.6)   |        | 81 (53.6)    | 81 (53.6)   |      |
| Bacteremia or fungemia, n (%)             | 50 (23.2)   | 52 (15.7)    | 0.03   | 26 (17.2)    | 29 (19.2)   | 0.66 |
| Shock, n (%)                              | 91 (42.1)   | 117 (35.4)   | 0.11   | 56 (37.1)    | 56 (37.1)   | 1.00 |
| SAPS II                                   | 49.9 ± 15.1 | 49.8 ± 14.7  | 0.95   | 49.9 ± 14.2  | 50.2 ± 15.2 | 0.89 |
| Lung injury score (Total score)           | 11.4 ± 1.9  | 10.95 ± 1.9  | 0.005  | 11.3 ± 1.8   | 11.5 ± 1.8  | 0.46 |
| PaO <sub>2</sub> /FiO <sub>2</sub> , mmHg | 96 (68-134) | 123 (84-181) | <0.001 | 104 (74-143) | 99 (66-140) | 0.45 |
| PaCO <sub>2</sub> (mmHg)                  | 37.5 ± 10.4 | 37.1 ± 10.5  | 0.67   | 37.4 ± 9.9   | 37.3 ± 8.7  | 0.97 |

|                                    |           |            |      |           |           |      |
|------------------------------------|-----------|------------|------|-----------|-----------|------|
|                                    |           |            |      |           |           |      |
| Comorbidity before ARDS            |           |            |      |           |           |      |
| Stroke, n (%)                      | 17 (7.9)  | 27 (8.2)   | 0.90 | 12 (8.0)  | 14 (9.3)  | 0.68 |
| Coronary artery disease, n (%)     | 15 (6.9)  | 30 (9.1)   | 0.38 | 12 (8.0)  | 12 (8.0)  | 1.00 |
| Heart failure, n (%)               | 15 (6.9)  | 23 (7.0)   | 1.00 | 8 (5.3)   | 8 (5.3)   | 1.00 |
| Cholestatic liver disease, n (%)   | 21 (9.7)  | 24 (7.3)   | 0.30 | 12 (8.0)  | 11 (7.3)  | 0.83 |
| Obstructive airway diseases, n (%) | 18 (8.3)  | 40 (12.1)  | 0.16 | 16 (10.6) | 18 (11.9) | 0.72 |
| Structure lung diseases, n (%)     | 27 (12.5) | 33 (10.0)  | 0.36 | 19 (12.6) | 20 (13.3) | 0.86 |
| Solid cancer, n (%)                | 57 (26.4) | 113 (34.1) | 0.06 | 46 (30.5) | 50 (33.1) | 0.62 |
| Hematological cancer, n (%)        | 34 (15.7) | 40 (12.1)  | 0.22 | 20 (13.3) | 20 (13.3) | 1.00 |

Data are measured on the ARDS day 1 and expressed as the mean  $\pm$  standard deviation or median (interquartile range) unless otherwise specified.

ARDS, Adult respiratory distress syndrome

SAPS, Simplified Acute Physiology Score

PEEP, Positive end-expiratory pressure

**Fig. S1. Propensity score distribution for the users and non-users of inhaled nitric oxide (iNO).**

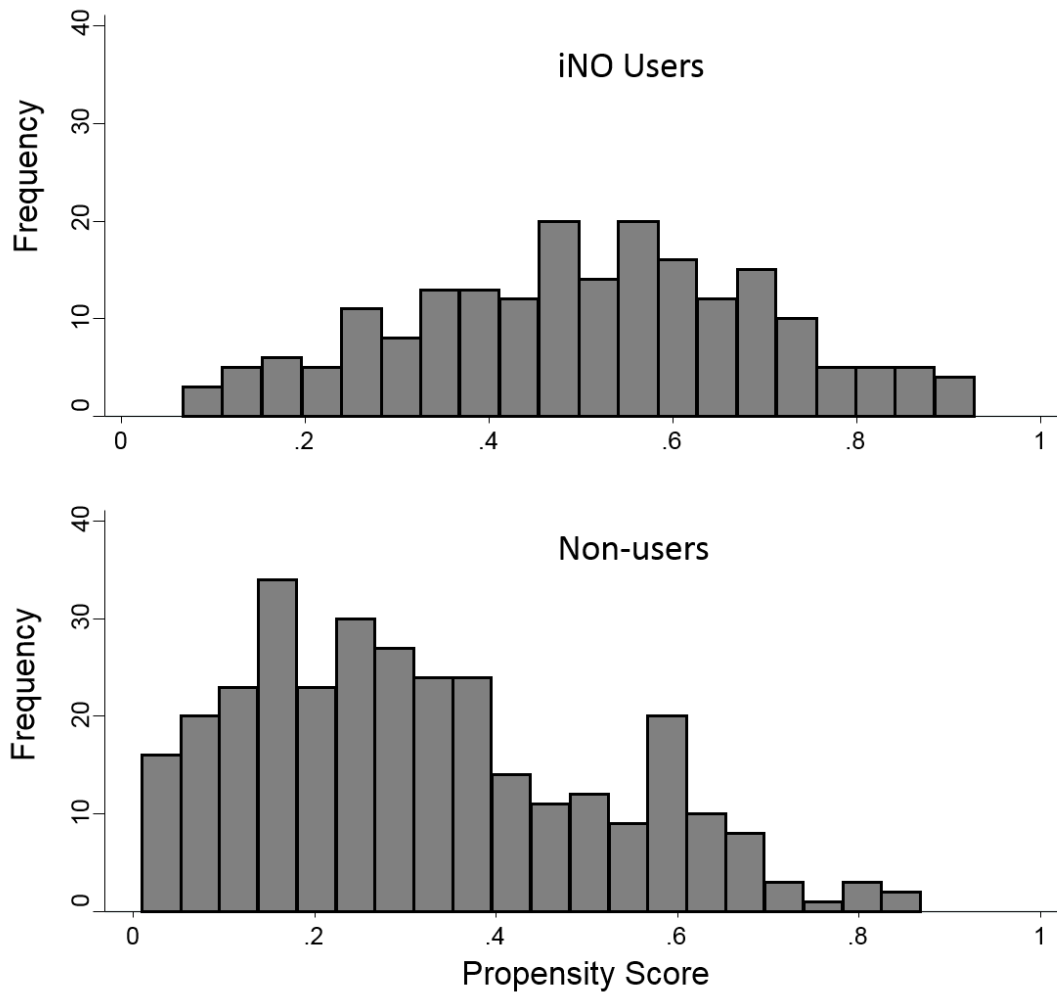

**Fig. S2.** The strength of an unmeasured confounder needed to move the observed effect to the null. iNO, inhaled nitric oxide. RRT, renal replacement therapy.

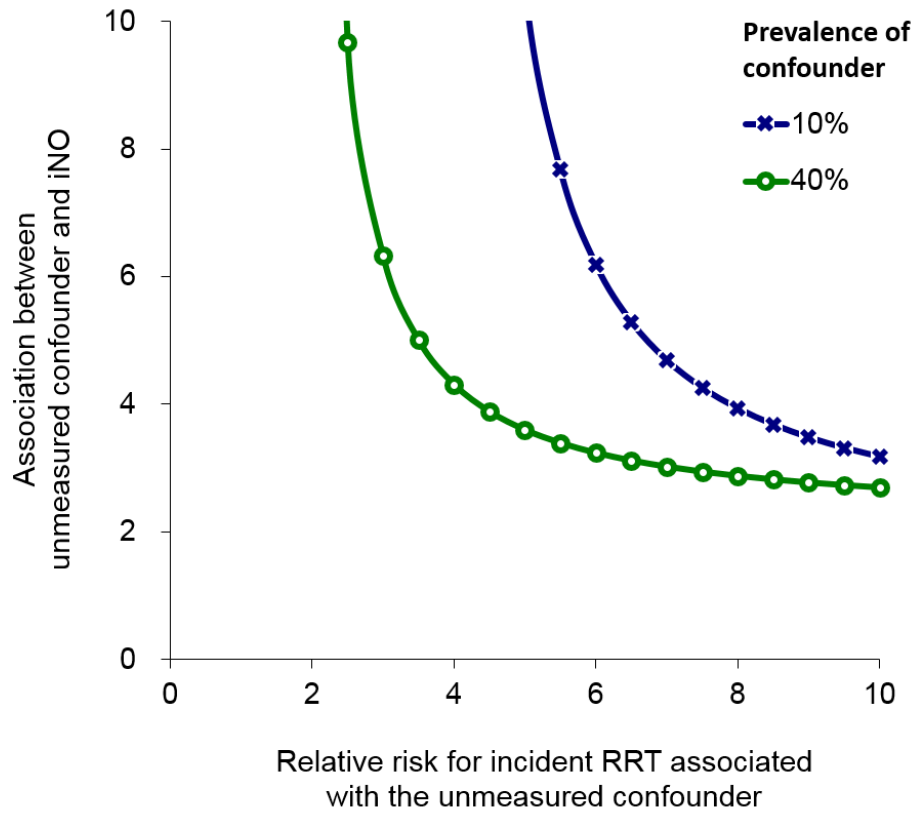

Supplement: 13054_2016_1566_MOESM1_ESM.pdf [file 13054_2016_1566_MOESM1_ESM.pdf]
